# Supplementary material
Source: Research Square preprint supplement (doi:10.21203/rs.3.rs-10351975/v1)
Supplement: Supplementary file 2 [file d0a1ddc3cb082c13a61e86bb.docx]

| **Characteristic** | **Overall**  N = 2,459 | **Group-A**  N = 1,289 | **Group-B**  N = 648 | **Group-C N = 522** |
| --- | --- | --- | --- | --- |
| Gender1 |  |  |  |  |
| Female | 779 (31.7) | 386 (29.9) | 202 (31.2) | 191 (36.6) |
| Male | 1,680 (68.3) | 903 (70.1) | 446 (68.8) | 331 (63.4) |
| Age1 |  |  |  |  |
| Adult (**≤**64 years) | 1,288 (52.4) | 600 (46.5) | 365 (56.3) | 323 (61.9) |
| Aged (≥65 years) | 1,171 (47.6) | 689 (53.5) | 283 (43.7) | 199 (38.1) |
| ECOG1 |  |  |  |  |
| ECOG 0 | 2,346 (95.4) | 1,218 (94.5) | 626 (96.6) | 502 (96.2) |
| ECOG ≥1 | 113 (4.6) | 71 (5.5) | 22 (3.4) | 20 (3.8) |
| NSCLC type1 |  |  |  |  |
| Adenocarcinoma | 1,683 (68.4) | 878 (68.1) | 436 (67.3) | 369 (70.7) |
| Large-cell | 10 (0.4) | 5 (0.4) | 3 (0.5) | 2 (0.4) |
| Squamous cell | 398 (16.2) | 212 (16.4) | 108 (16.7) | 78 (14.9) |
| Unspecified | 368 (15.0) | 194 (15.1) | 101 (15.6) | 73 (14.0) |
| NSCLC Stage1 |  |  |  |  |
| Stage I/II | 108 (4.4) | 42 (3.3) | 39 (6.0) | 27 (5.2) |
| Stage III/IV | 2,351 (95.6) | 1,247 (96.7) | 609 (94.0) | 495 (94.8) |
| Surgery1 |  |  |  |  |
| No | 1,892 (76.9) | 1,048 (81.3) | 483 (74.5) | 361 (69.2) |
| Yes  Lobectomy  Lung transplant  Lymph node dissection  Pleurectomy  Pneumonectomy  Segmentectomy  Thoracotomy  Thymectomy  Wedge resection  Other procedures | 567 (23.1)  266 (10.8)  1 (0.0)  317 (12.9)  1 (0.0)  24 (1.0)  8 (0.3)  7 (0.3)  1 (0.0)  139 (5.7)  360 (14.6) | 241 (18.7)  117 (9.1)  1 (0.1)  138 (10.7)  1 (0.1)  10 (0.8)  5 (0.4)  3 (0.2)  1 (0.1)  66 (5.1)  157 (12.2) | 165 (25.5)  80 (12.3)  0 (0.0)  95 (14.7)  0 (0.0)  6 (0.9)  2 (0.3)  3 (0.5)  0 (0.0)  35 (5.4)  96 (14.8) | 161 (30.8)  69 (13.2)  0 (0.0)  84 (16.1)  0 (0.0)  8 (1.5)  1 (0.2)  1 (0.2)  0 (0.0)  38 (7.3)  107 (20.5) |
| Radiotherapy1 |  |  |  |  |
| No | 1,552 (63.1) | 972 (75.4) | 353 (54.5) | 227 (43.5) |
| Yes  Comorbidity1  No  Yes | 907 (36.9)  1323 (53.8)  1136 (46.2) | 317 (24.6)  747 (58.0)  542 (42.0) | 295 (45.5)  338 (52.2)  310 (47.8) | 295 (56.5)  238 (45.6)  284 (54.4) |
| BSA2 |  |  |  |  |
| **≤**1.65 | 1,132 (46.0) | 642 (49.8) | 278 (42.9) | 212 (40.6) |
| ≥1.66 | 1,327 (54.0) | 647 (50.2) | 370 (57.1) | 310 (59.4) |
| Platelets (10x10^12/L)2 | 278.2 ± 112.4 | 282.1 ± 118.8 | 276.1 ± 108.5 | 271.0 ± 100.3 |
| RBC (10x10^12/L)2 | 4.4 ± 0.5 | 4.3 ± 0.6 | 4.4 ± 0.5 | 4.5 ± 0.5 |
| WBC (10x10^3 cells/ul)2 | 8.4 ± 6.5 | 9.1 ± 6.5 | 7.9 ± 5.3 | 7.4 ± 7.8 |
| Albumin (g/dL)2 | 3.6 ± 0.7 | 3.5 ± 0.7 | 3.7 ± 0.6 | 3.9 ± 0.6 |
|  | | | | |

**Table 1:** Post stratification non-small cell lung cancer patient baseline characteristics. 1n (%); 2Mean ± SD (standard deviation).

| **Characteristic** | **Group-A**  N = 1,289 | | | **Group-B**  N = 648 | | | **Group-C** N = 522 | | |
| --- | --- | --- | --- | --- | --- | --- | --- | --- | --- |
| Gender | OR | 95% CI | *p*-value | OR | 95% CI | *p*-value | OR | 95% CI | *p*-value |
| Female | - | - |  | - | - |  | - | - |  |
| Male | 1.73 | 1.24 - 2.40 | **0.001** | 2.28 | 1.52 - 3.46 | **<0.001** | 2.95 | 1.28 - 7.13 | **0.013** |
| **Age**  Adult (**≤**64 years)  Aged (≥65 years) | -  1.17 | -  0.88 – 1.55 | 0.3 | -  1.19 | -  0.84 - 1.67 | 0.3 | -  0.73 | -  0.37 – 1.41 | 0.4 |
| **PS ECOG** |  |  |  |  |  |  |  |  |  |
| ECOG 0 | - | - |  | - | - |  | - | - |  |
| ECOG ≥1 | 0.85 | 0.49 - 1.53 | 0.6 | 1.53 | 0.63 - 3.80 | 0.3 | 0.75 | 0.04 - 4.31 | 0.7 |
| **NSCLC type** |  |  |  |  |  |  |  |  |  |
| Adenocarcinoma | - | - |  | - | - |  | - | - |  |
| Large-cell | 5.7 | 0.01 - 6.8 | >0.9 | 0.33 | 0.01 - 3.66 | 0.4 | 13.8 | 0.51 - 17.5 | 0.074 |
| Squamous cell | 1.20 | 0.80 - 1.83 | 0.4 | 1.03 | 0.65 - 1.64 | >0.9 | 2.99 | 1.12 - 6.11 | **0.022** |
| Unspecified | 0.85 | 0.58 - 1.24 | 0.4 | 0.96 | 0.61 - 1.52 | 0.9 | 4.45 | 1.96 - 9.51 | **<0.001** |
| **Stage** |  |  |  |  |  |  |  |  |  |
| I/II | - | - |  | - | - |  | - | - |  |
| III/IV | 2.45 | 1.25 - 4.83 | **0.009** | 3.19 | 1.39 - 8.28 | **0.01** | 2.3 | 0.1 – 3.9 | >0.9 |
| **Surgery**  No  Yes  Lobectomy  No  Yes  Lymph node dissection  No  Yes  Wedge resection  No  Yes  Other procedures  No  Yes | -  0.38  -  0.75  -  0.76  -  0.57  -  0.54 | -  0.28 - 0.53  -  0.43 - 1.34  0.42 - 1.39  -  0.33 - 1.01  -  0.33 - 0.87 | **<0.001**  0.3  0.4  **0.05**  **0.009** | -  0.54  -  0.50  -  0.41  -  0.42  -  1.45 | -  0.36 - 0.80  -  0.26 - 0.94  -  0.20 - 0.81  -  0.17 - 0.94  -  0.81 - 2.65 | **0.003**  **0.03**  **-**  **0.012**  **0.045**  0.2 | -  0.42  -  0.60  -  1.16  -  1.14  -  0.64 | -  0.16 - 0.94  -  0.15 - 1.88  -  0.34 - 3.69  -  0.25 - 3.75  -  0.21 - 1.68 | **0.05**  0.4  0.8  0.8  0.4 |
| **Radiotherapy**  No  Yes  **Comorbidity**  No  Yes  **Body surface area**  **≤**1.65  ≥1.65 | -  0.64  -  1.03    -  0.93 | -  0.47 - 0.88  -  0.78 - 1.36  -  0.68 - 1.27 | **0.005**  0.9  0.7 | -  0.69  -  0.70  -  0.82 | -  0.50 - 0.95  -  0.50 - 0.99  -  0.57 - 1.18 | **0.025**  **0.04**    0.3 | -  0.46  -  0.57  -  0.35 | -  0.24 - 0.88  -  0.29 - 1.10  -  0.17 - 0.73 | **0.02**  0.10  **0.005** |

**Table 2:** Odds of 1-year mortality in chemotherapy prescription frequency stratified sub-groups of non-small cell lung cancer. Abbreviations: CI; Confidence Interval, OR; Odds Ratio, NSCLC; non-small cell lung cancer, PS ECOG; Performance status Eastern cooperative Oncology Group.

| **Characteristic** | **Group-A**  1,289 (52.4) | **Group-B**  N = 648 (26.4) | ***p*-value2 (Group-A**  **Vs Group-B)** | **Group-C**  N = 522 (21.2) | ***p*-value2 (Group-A Vs Group-C)** |
| --- | --- | --- | --- | --- | --- |
| **Post chemotherapy start survival**  Oral formulation users (months) $  Oral plus injection users (months) $  Injection users (months)$  Post singlet therapy OS (months)#  Post doublet therapy OS (months)##  RTKI singlet users (oral formulation)1  Post RTKI therapy start OS (months)$  Other singlets users (Injection or Oral)1  Post other singlet therapy start OS (months)$  **Metastasis during chemotherapy**1 | 13.5 (11.1 - 15.8) **  12.6 (10.6 - 14.5)  7.5 (6.7 - 8.2) **  9.1 (7.9 -10.2)  12.8 (8.1 - 9.8)  191 (14.8)  12.2 (10.3 -14) **  203 (15.7)  6.1 (4.9 - 7.2) ** | 32.4 (25.9 - 38.8) **  24 (21.8 - 26.1)  16.4 (14.8 - 17.9) **  30.9 (24.3 - 37.4) **  18.4 (17.1 - 19.6) **  24 (3.7)  32.7 (26 - 39.3) **  10 (1.5)  26.8 (10.8 - 42.7) ** | **<0.0001**  **<0.0001**  **<0.0001**  **<0.0001**  **<0.0001**  **<0.0001**  **<0.0001**  **<0.0001**  **<0.0001**  **<0.001** | 65.1 (44.3 - 85.8) **  40.7 (37.6 - 43.7)  31.5 (29.1 - 33.8) **  64.9 (47.5 - 82.2) ***  35.6 (33.6 - 37.5) ***  12 (2.2)  65.4 (42.8 - 87.9) **  5 (0.9)  63.8 (36 - 91.5) ** | **<0.0001**  **<0.0001**  **<0.0001**  **<0.0001**  **<0.0001**  **<0.0001**  **<0.0001**  **<0.0001**  **<0.0001**  **<0.001** |
| Yes | 259 (20.1) | 215 (33.2) |  | 227 (43.5) |  |
| No | 1,030 (79.9) | 433 (66.8) |  | 295 (56.5) |  |
| **Metastatic site change** |  |  | **0.004** |  | **0.008** |
| No new metastatic site1 | 301 (23.4) | 125 (19.3) |  | 100 (19.2) |  |
| One or two new sites1 | 608 (47.2) | 286 (44.1) |  | 231 (44.3) |  |
| Three or more new sites1 | 380 (29.5) | 237 (36.6) |  | 191 (36.6) |  |
| Progression free survival (months) $ | 8 (7.1 – 8.8) | 11 (9.5 – 12.4) | **0.0002** | 18 (15.7 – 20.2) | **<0.0001** |
| Post diagnosis survival (months) $ | 17 (15.7 – 18.2) | 26 (23.9 – 27.8) | **<0.0001** | 46 (43 – 48) | **<0.0001** |
| Post chemo-start survival (months) $  1-month deaths1  6-month deaths1  1-year deaths1  2-year deaths1  3-year deaths1  4-Year deaths1  5-year deaths1 | 9 (8.3 - 9.6)  128 (9.9)  749 (58.1)  1002 (77.7)  1192 (92.5)  1243 (96.4)  1267 (98.2)  1274 (98.8) | 19 (17.7 – 20.2)  2 (0.3)  115 (17.7)  294 (45.4)  477 (73.6)  566 (87.3)  610 (94.1)  628 (96.9) | **<0.0001**  **<0.001**  **<0.001**  **<0.001**  **<0.001**  **<0.001**  **0.001**  **0.001** | 36.6 (34.6 – 38.5)  0 (0.0)  6 (1.1)  48 (9.2)  190 (36.4)  316 (60.5)  403 (77.2)  439 (84.0) | **<0.0001**  **<0.001**  **<0.001**  **<0.001**  **<0.001**  **<0.001**  **<0.001**  **<0.001** |
| Post chemo end survival (months) $  **Adverse Events**  Liver impairment (Severe/Non-severe) 1  Renal failure (Severe) 1  Anemia (Severe/Non-severe) 1  Neutropenia (below 0.5x10^3 cells/ul) 1  Neutrophilia (above 30x10^3 cells/ul) 1  Thrombocytopenia (below 50x10^12/L) 1  Thrombocytosis (above 450x10^12/L) 1 | 4.2 (3.6 – 4.7)  10 (0.8)  25 (1.9)  32 (2.4)  151 (11.7)  85 (6.6)  241 (18.6)  361 (28) | 4.1 (3.2 – 4.9)  7 (1)  9 (1.3)  24 (3.7)  95 (14.6)  28 (4.3)  99 (15.2)  202 (31.1) | 0.833  0.1  0.4  0.3  0.2  0.3  0.2  0.2 | 2.7 (2.1 – 3.2)  6 (1)  7 (1.3)  16 (3)  65 (12.4)  6 (1.1)  47 (9)  112 (21.4) | **<0.0009**  0.4  0.4  0.4  0.4  0.2  **0.05**  0.08 |
|  | | | | | |

**Table 3:** Outcome in chemotherapy prescription stratified sub-groups in non-small cell lung cancer (NSCLC) patients. 1n (%); number of patients, p-value; 2Pearson's Chi-squared test. $Mean, 95% confidence Interval (CI). Based on outcome group-A is considered as non-responder, group-B as moderate responder, and group-C as responder of anti-cancer drugs. #(N=445) total singlet users, group-A (n=394), group-B (n=34), group-C (n=17). Total doublet users ##(N=2014), group-A (n=895), group-B (n=614), group-C (n=505). Among same group statistical significance(*p*-value) is shown using *** <0.0001; ** 0.001, and * 0.05. All adverse events occurred within 1-year post-chemotherapy initiation are shown above, patients experiencing hepatic/renal or hematological events prior to chemotherapy were excluded.

| Year wise Deaths in groups | Overall  N=2014 | Alkylating, Anti-mitotic | Alkylating, Pyrimidines | Alkylating, Taxane | Antimetabolite, Alkylating | Antimetabolite, Taxane | Other doublet combinations | Topoisomerase II Inhibitor, Alkylating | RTKI, Alkylating | RTKI, Antimetabolite |
| --- | --- | --- | --- | --- | --- | --- | --- | --- | --- | --- |
| Group-A  1-Year Deaths | 895 (44.4)  709 (79.2) | N = 461  25 (54.3) | N = 571  52 (91.2) | N = 3591  280 (78.0) | N = 2211  194 (87.8) | N = 191  13 (68.4) | N = 1021  82 (80.4) | N = 361  33 (91.7) | N = 141  11 (78.6) | N = 411  19 (46.3) |
| 2-Year Deaths | 121 (13.5) | 7 (15.2) | 2 (3.5) | 57 (15.9) | 19 (8.6) | 4 (21.1) | 14 (13.7) | 2 (5.6) | 0 (0.0) | 16 (39.0) |
| 3-Year Deaths  ≥4-Year Deaths  Group-B  1-Year Deaths  2-Year Deaths  3-Year Deaths  ≥4-Year Deaths  Group-C  1-Year Deaths  2-Year Deaths  3-Year Deaths  ≥4-Year Deaths | 35 (3.9)  30 (3.4)  614 (30.4)  289 (47.1)  174 (28.3)  82 (13.4)  69 (11.2)  505 (25.0)  47 (9.3)  140 (27.7)  124 (24.6)  194 (38.4) | 8 (17.4)  6 (13.0)  N = 641  15 (23.4)  19 (29.7)  12 (18.8)  18 (28.1)  N = 501  0 (0.0)  7 (14.0)  13 (26.0)  30 (60.0) | 1 (1.8)  2 (3.5)  N = 571  44 (77.2)  11 (19.3)  1 (1.8)  1 (1.8)  N = 391  8 (20.5)  17 (43.6)  6 (15.4)  8 (20.5) | 10 (2.8)  12 (3.3)  N = 1911  77 (40.3)  61 (31.9)  30 (15.7)  23 (12.0)  N = 1201  12 (10.0)  27 (22.5)  33 (27.5)  48 (40.0) | 5 (2.3)  3 (1.4)  N = 1501  87 (58.0)  34 (22.7)  17 (11.3)  12 (8.0)  N = 991  11 (11.1)  36 (36.4)  20 (20.2)  32 (32.3) | 1 (5.3)  1 (5.3)  N = 41  0 (0.0)  0 (0.0)  4 (100.0)  0 (0.0)  N = 111  2 (18.2)  4 (36.4)  3 (27.3)  2 (18.2) | 4 (3.9)  2 (2.0)  N = 451  18 (40.0)  17 (37.8)  7 (15.6)  3 (6.7)  N = 681  4 (5.9)  20 (29.4)  22 (32.4)  22 (32.4) | 0 (0.0)  1 (2.8)  N = 521  39 (75.0)  10 (19.2)  1 (1.9)  2 (3.8)  N = 331  6 (18.2)  13 (39.4)  8 (24.2)  6 (18.2) | 0 (0.0)  3 (21.4)  N = 211  1 (4.8)  9 (42.9)  4 (19.0)  7 (33.3)  N = 431  3 (7.0)  9 (20.9)  7 (16.3)  24 (55.8) | 6 (14.6)  0 (0.0)  N = 301  8 (26.7)  9 (30.0)  10 (33.3)  3 (10.0)  N = 421  1 (2.4)  7 (16.7)  12 (28.6)  22 (52.4) |

**Table 4**: Year wise mortality rates in first-line doublet users 1(N=2014) diagnosed with NSCLC in stratified groups. 1n (%); number of patients. Refer supplementary Table 1-15 for detailed insight of mortalities in each group.

**Table 5:** Prognosis of chemotherapy response based on average WBC counts obtained 7 days prior to chemotherapy initiation in non-small cell lung cancer (n=2129/2459) patients. Comparison of overall survival between leukopenia (>3.9 x 109 cells/L or less) Vs normal (4-5.9x109 cells/L) range of WBC counts, and leukocytosis (10.81 x 109 cells/L or above) Vs normal (4-5.9x109 cells/L)range of WBC counts.

|  | **WBC Count** | **Group-A**  **N=1,136** | | | | **Group-B**  **N=582** | | | | **Group-C**  **N=411** | | | |
| --- | --- | --- | --- | --- | --- | --- | --- | --- | --- | --- | --- | --- | --- |
| Resected (n=493) | WBC Range | N | OS (95%CI) | ±SD | *p*-value | N | OS (95%CI) | ±SD | *p*-value | N | OS (95% CI) | ±SD | *p*-value |
|  | **≤** 3.9 x 109(a) | 9 | 14.7 (10.9 -18.4) | ±5.8 | (a Vs b) 0.5 | 7 | 24.2 (12.3 - 36) | ±16 | (a Vs b) 0.5 | 7 | 49 (25.3 – 72.7) | ±32.09 | (a Vs b) 0.9 |
|  | 4 - 5.9 x 109 (b) | 47 | 19.5 (13 - 25.9) | ±22.7 | (b Vs a) 0.5 | 37 | 28.2 (23.4 - 32.9) | ±14.8 | (b Vs a) 0.5 | 28 | 50.3 (38.8 – 61.7) | ±31.02 | (b Vs a) 0.9 |
|  | 6 - 7.9 x 109 (c) | 72 | 16.1 (11.2 - 20.9) | ±21.03 | (c Vs a) 0.8 | 55 | 27.8 (21.3 - 34.2) | ±24.5 | (c Vs a) 0.7 | 58 | 37.3 (32.6 – 41.9) | ±17.9 | (c Vs a) 0.1 |
|  | 8.1 - 10.80 x 109 (d) | 56 | 14.7 (9.1 - 20.2) | ±21.3 | (d Vs a) 0.1 | 39 | 24.4 (17.3 - 31.4) | ±22.6 | (d Vs a) 0.9 | 32 | 45.5 (35.3 – 55.6) | ±29.4 | (d Vs a) 0.7 |
| Unresected (n=1636) | ≥10.81 x 109 (e)  WBC Range  **≤** 3.9 x 109(f)  4 - 5.9 x 109 (g)  6 - 7.9 x 109 (h)  8.1 - 10.80 x 109 (i)  ≥10.81 x 109 (j) | 23  N  36  138  240  272  243 | 5.3 (2.6 - 7.9)  OS (95%CI)  7.8 (4.7 - 10.8)  9.6 (7.9 - 11.2)  8.5 (7.4 - 9.5)  7.1 (5.7 - 8.4)  4.7 (3.9 - 5.4) | ±6.5  ±SD  ±9.3  ±9.9  ±8.6  ±11.1  ±5.8 | (e Vs b) **0.004**  *p*-value  (f Vs g) 0.3  (g Vs f) 0.3  (h Vs f) 0.6  (i Vs f) 0.7  (j Vs g) **<0.0001** | 11  N  17  76  143  114  83 | 18.9 (11.6 - 26.1)  OS (95%CI)  14.2 (9.2 - 19.1)  18.6 (15.4 - 21.7)  19 (16.4 -21.5)  15.8 (13.6 - 17.9)  12.2 (9.4 - 14.9) | ±12.2  ±SD  ±10.5  ±13.9  ±15.7  ±11.9  ±13 | (e Vs b) 0.06  *p*-value  (f Vs g) 0.2  (g Vs f) 0.2  (h Vs f) 0.2  (i Vs f) 0.6  (j Vs g) **0.04** | 12  N  10  56  107  69  32 | 40.8 (26.3 – 55.2)  OS (95% CI)  52.1 (37.1 - 67)  37.1 (30.1 - 44)  31.6 (27.8 - 35.3)  33.2 (28.1 - 38.2)  30.1 (24.1 - 36) | ±25.5  ±SD  ±24.2  ±26.5  ±19.7  ±21.4  ±17.1 | (e Vs b) 0.3  *p*-value  (f Vs g) 0.1  (g Vs f) 0.1  (h Vs f) **0.002**  (i Vs f) **0.01**  (j Vs g) 0.1 |
